# Supplementary material for: Sulfonic nucleic acids (SNAs): a new class of substrate mimics for ribonuclease A inhibition
Source: Royal Society of Chemistry journal article supplement (doi:10.1039/c9ob01250h), 2019-01-01
Supplement: c9ob01250h1.pdf [file c9ob01250h1.pdf]

## Supporting Information

### **Sulfonic Nucleic Acids (SNA): A New Class of Substrate Mimic for Ribonuclease A Inhibition**

Dhrubajyoti Datta, Swagata Dasgupta\* and Tanmaya Pathak\*  
Department of Chemistry, Indian Institute of Technology Kharagpur, Kharagpur, India, 721302

#### Table of Contents:

---

|                                                              |            |
|--------------------------------------------------------------|------------|
| <b>Experimental section</b>                                  |            |
| <sup>1</sup> H-/ <sup>13</sup> C-NMR of compound <b>1</b>    | <b>S-1</b> |
| <sup>1</sup> H-/ <sup>13</sup> C -NMR of compound <b>3</b>   | <b>S-2</b> |
| <sup>1</sup> H-/ <sup>13</sup> C -NMR of compound <b>2</b>   | <b>S-3</b> |
| <sup>1</sup> H-/ <sup>13</sup> C -NMR of compound <b>4</b>   | <b>S-5</b> |
| <b>Biophysical data:</b>                                     |            |
| Lineweaver-Burk plots of compounds <b>2</b> and <b>4</b>     | <b>S-7</b> |
| Histogram of Agarose Gel for compounds <b>2</b> and <b>4</b> | <b>S-7</b> |
| Docked poses of inhibitor-RNase A complexes                  | <b>S-8</b> |
| H-bonding Distance measurement from Docking Studies          | <b>S-9</b> |

---

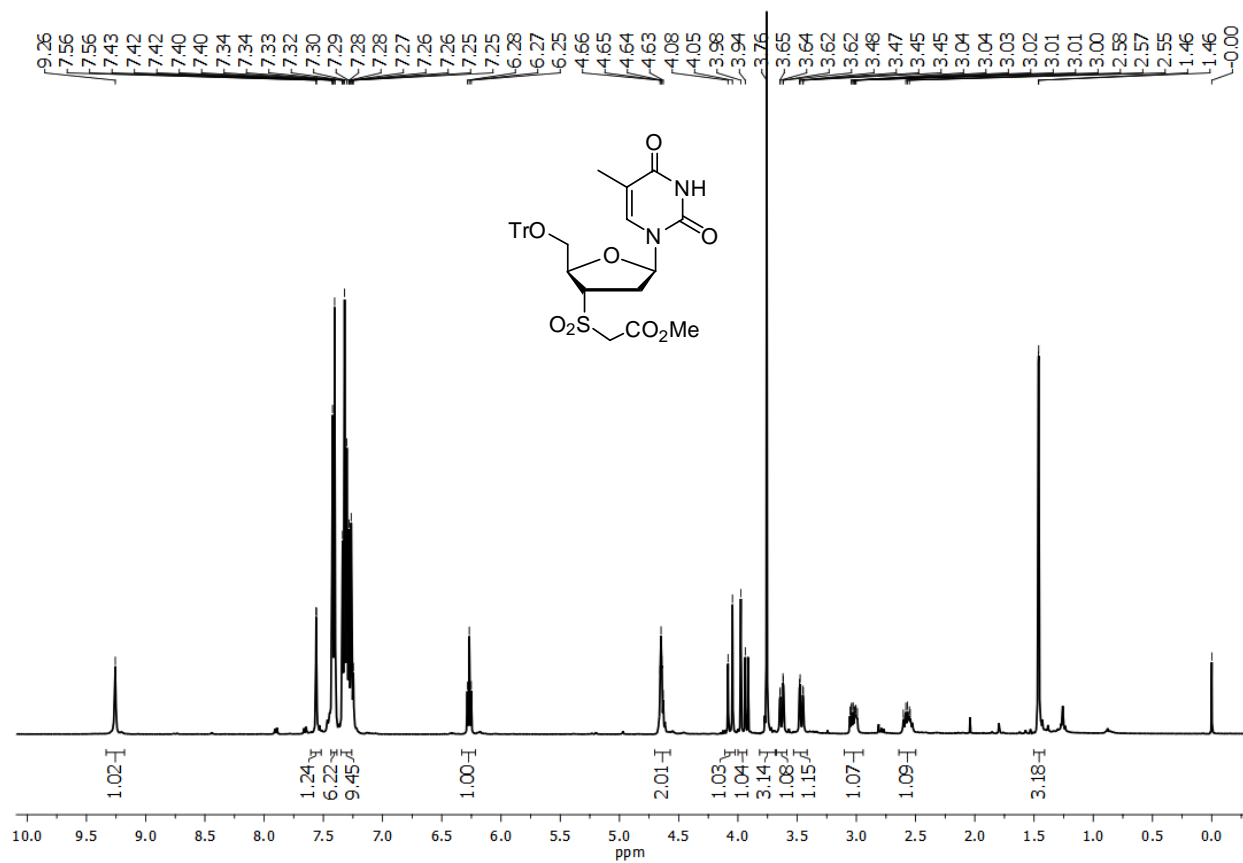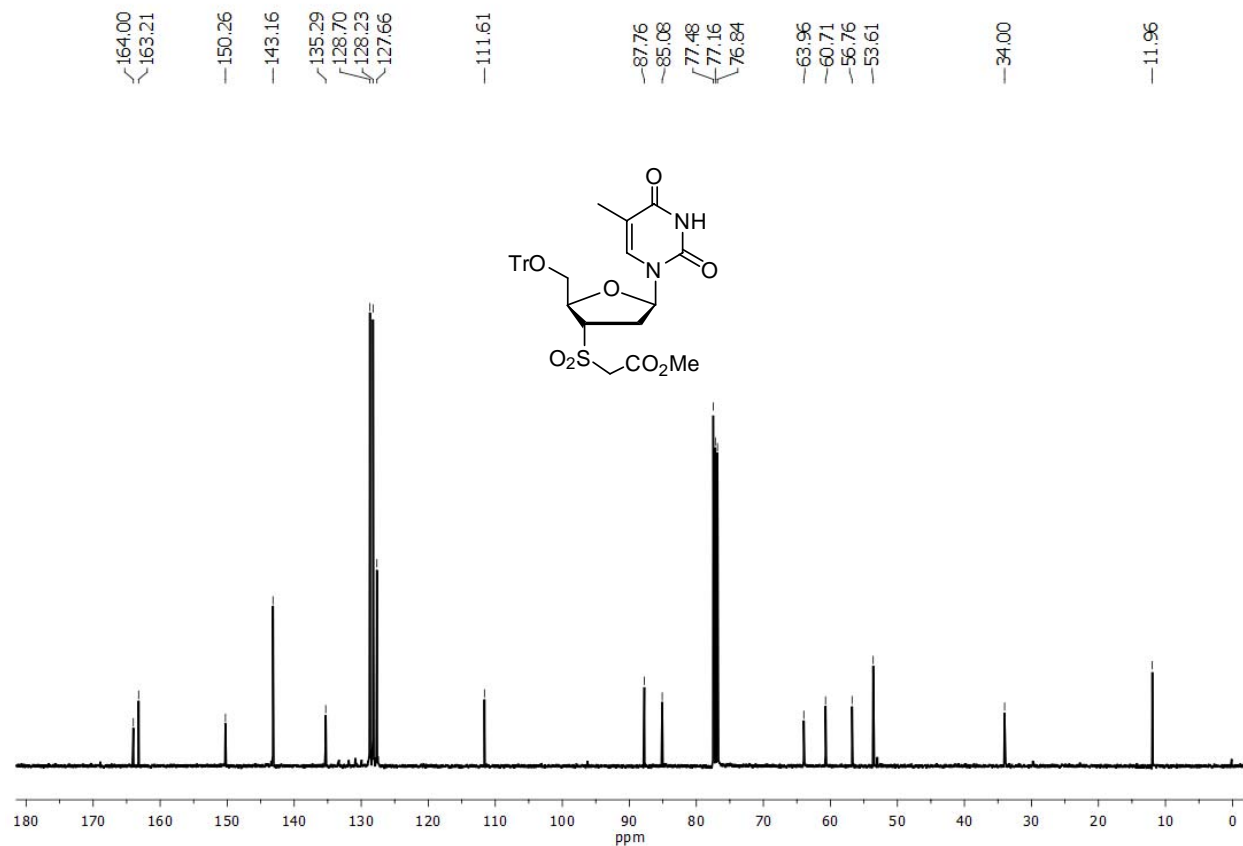

Figure S1: (A)  $^1\text{H}$  (400 MHz) and (B)  $^{13}\text{C}$  NMR (100 MHz) of 1

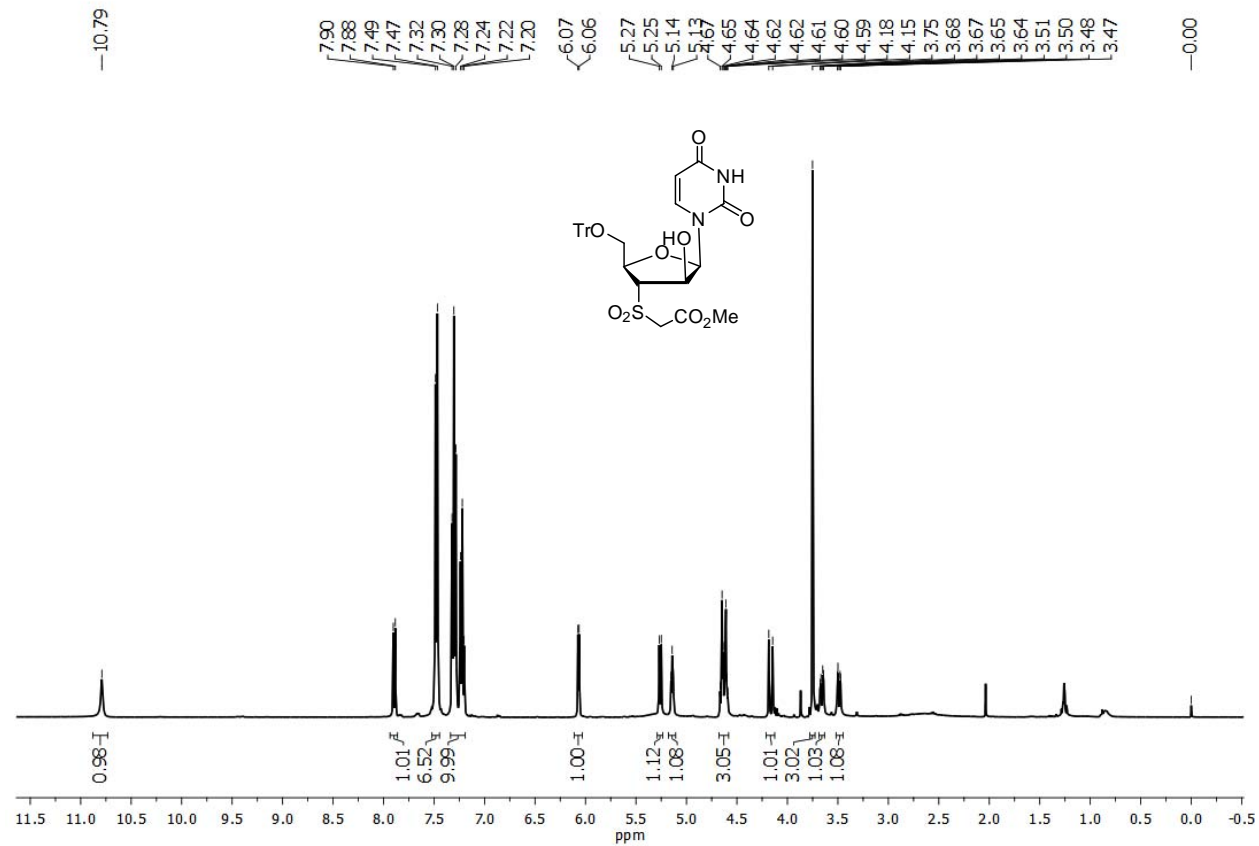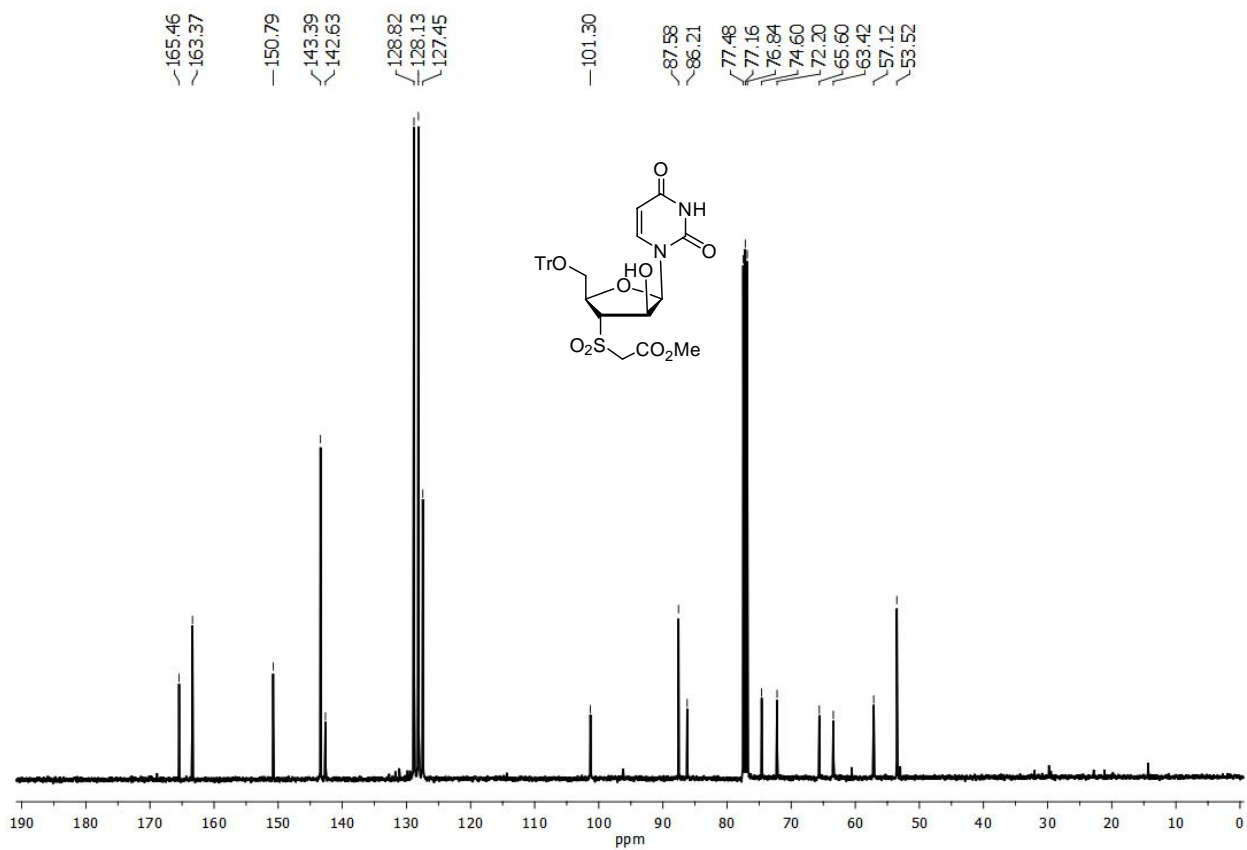

**Figure S2:** (A)  $^1\text{H}$  (400 MHz) and (B)  $^{13}\text{C}$  NMR (100 MHz) of **3**

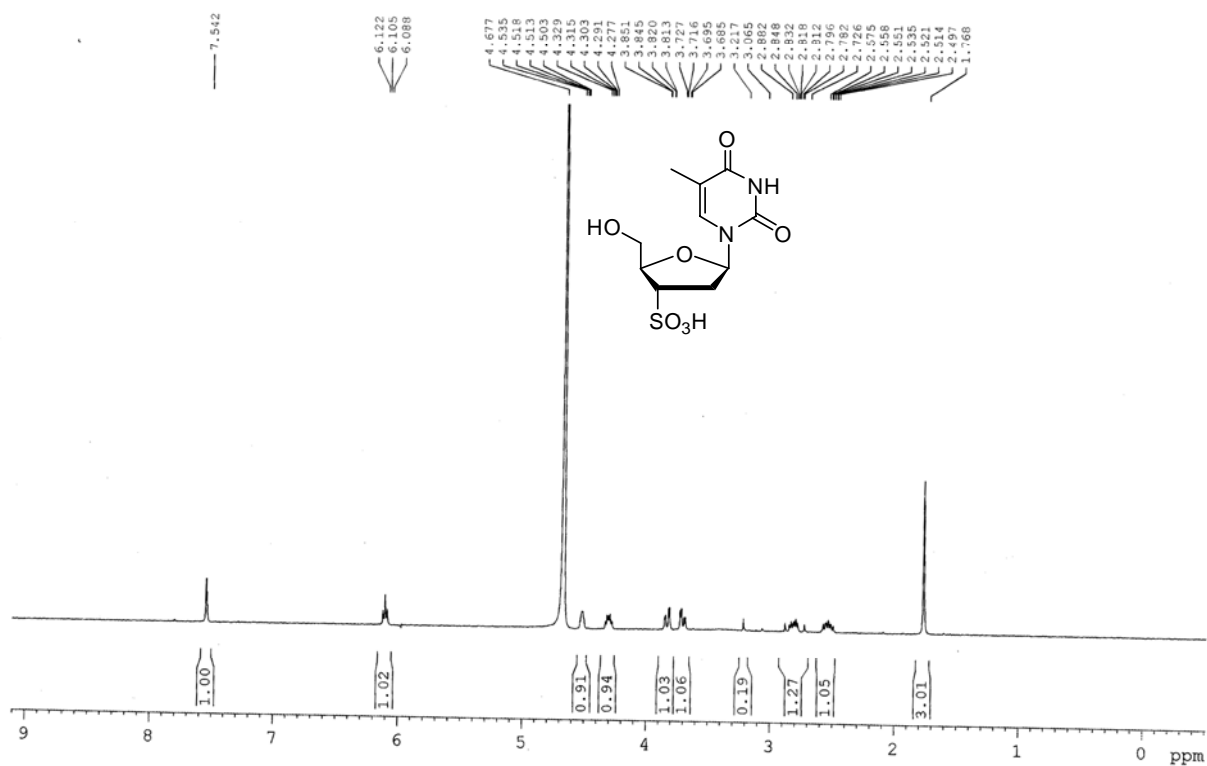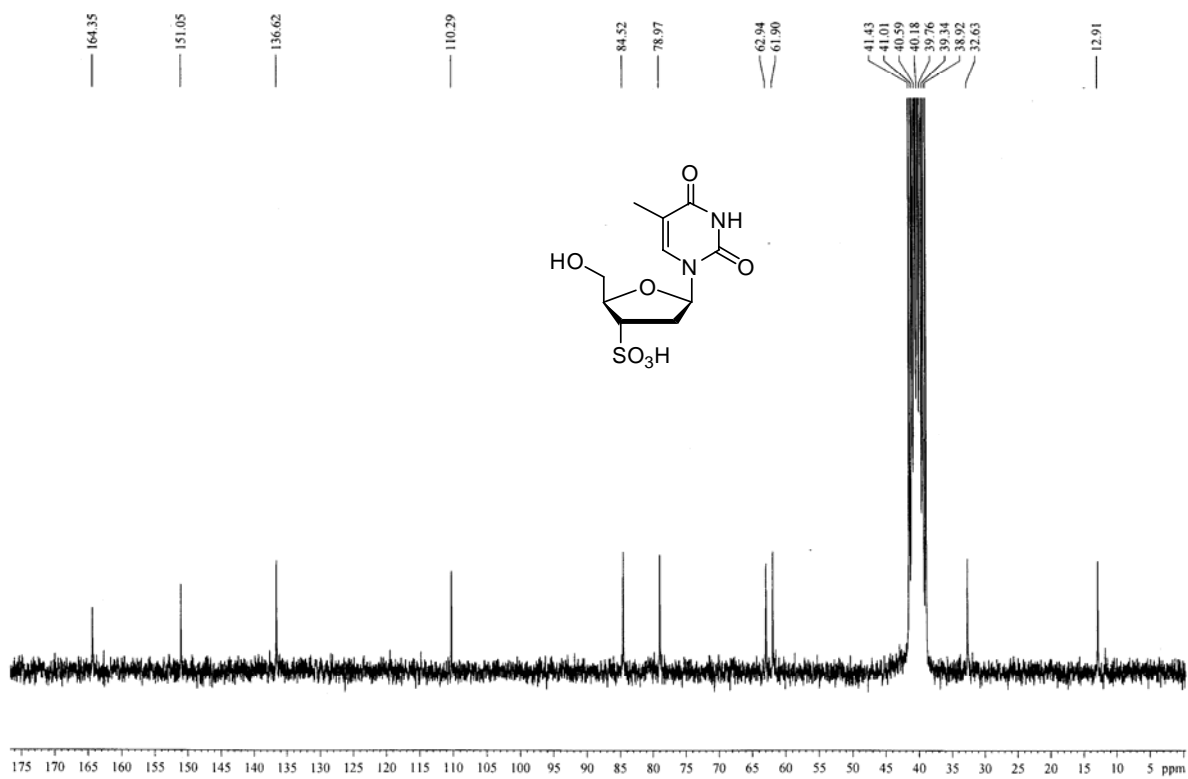

Figure S3: (A)  $^1\text{H}$  (400 MHz) and (B)  $^{13}\text{C}$  NMR (100 MHz) of 2

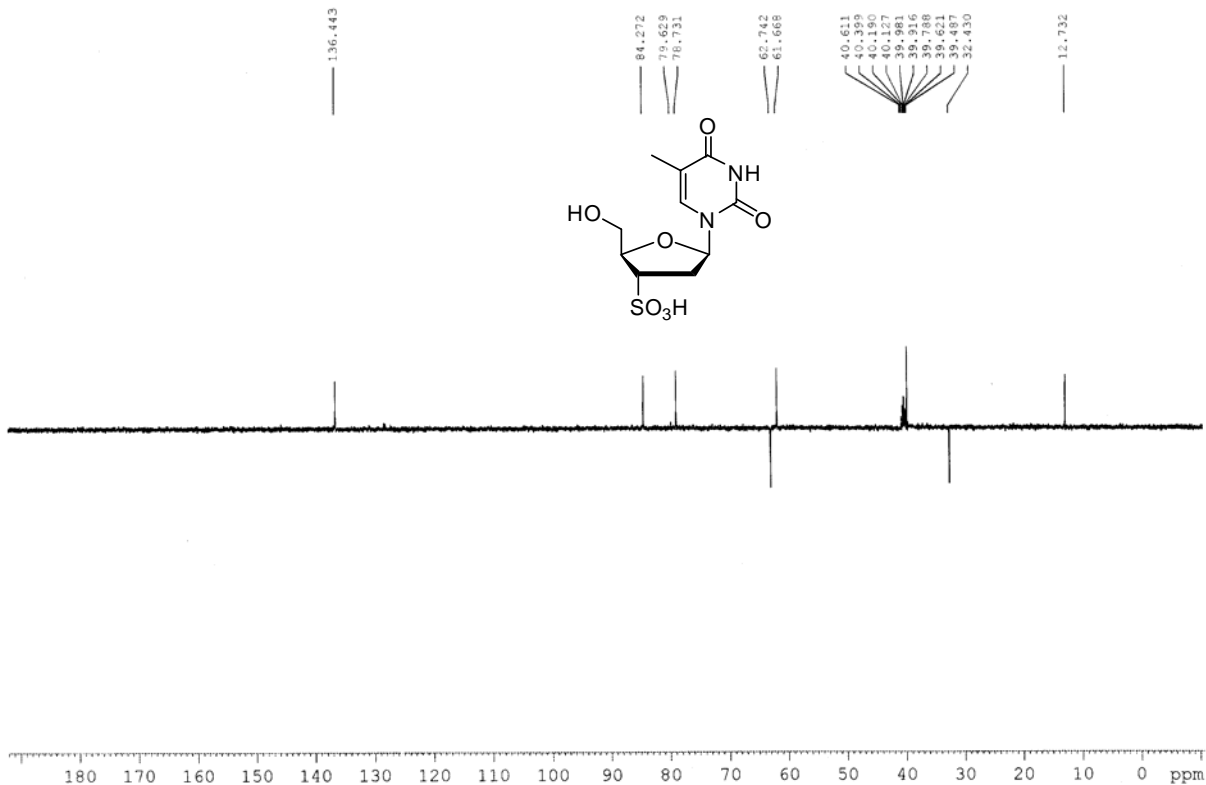

### Elemental Composition Report

Page 1

#### Single Mass Analysis (displaying only valid results)

Tolerance = 20.0 PPM / DBE: min = -1.5, max = 50.0

Isotope cluster parameters: Separation = 1.0 Abundance = 1.0%

Monoisotopic Mass, Odd and Even Electron Ions

139 formula(e) evaluated with 3 results within limits (up to 50 closest results for each mass)

21-Sep-2011

PTDJ001 30 (0.549) AM (Cen,4, 90.00, Ar,0,0,556.24,0,00); Cm (1:54)

17:42:44  
TOF MS ES+  
3.92e4

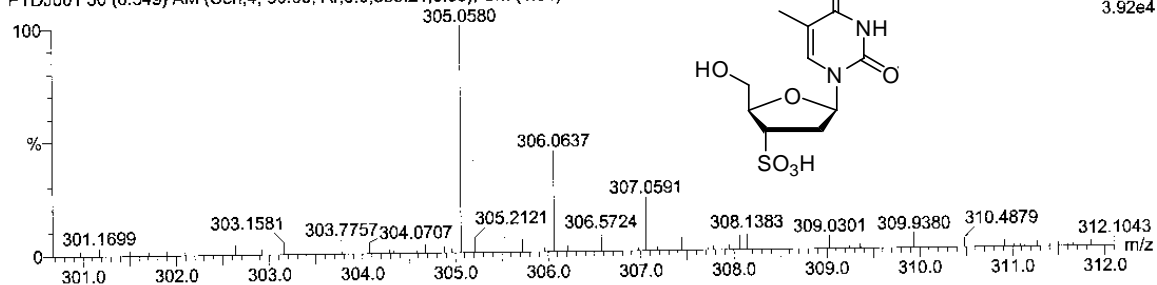

Minimum:

Maximum:

200.0 20.0 -1.5  
50.0 50.0

| Mass     | Calc. Mass | mDa  | PPM   | DBE | Score | Formula                               |
|----------|------------|------|-------|-----|-------|---------------------------------------|
| 307.0591 | 307.0600   | -0.9 | -2.9  | 4.5 | 1     | C10 H15 N2 O7 S ✓ [M+10] <sup>+</sup> |
|          | 307.0539   | 5.2  | 16.8  | 5.0 | 2     | C10 H13 N O10                         |
|          | 307.0652   | -6.1 | -19.8 | 5.0 | 3     | C9 H13 N3 O9                          |

Figure S4: (A) DEPT 135 (100 MHz) and (B) Elemental composition of 2

pt / dj / usnar - ws

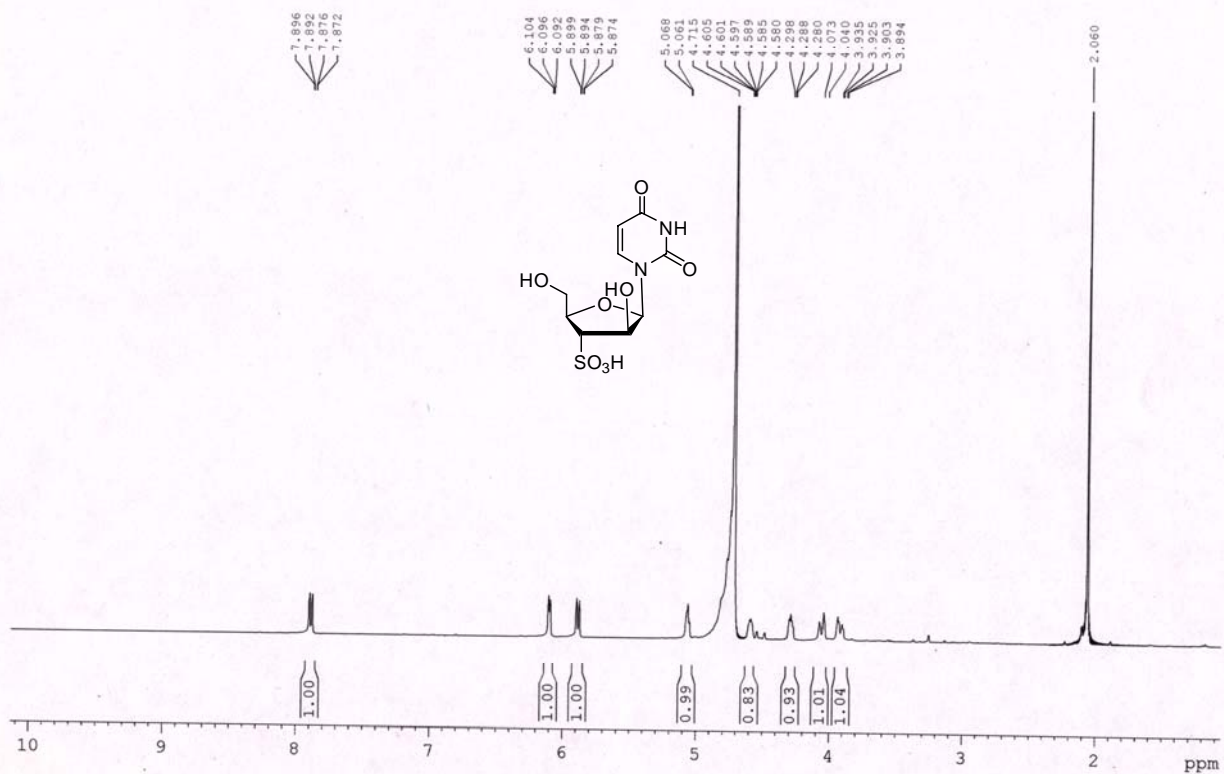

pt / dj / usna - 13c

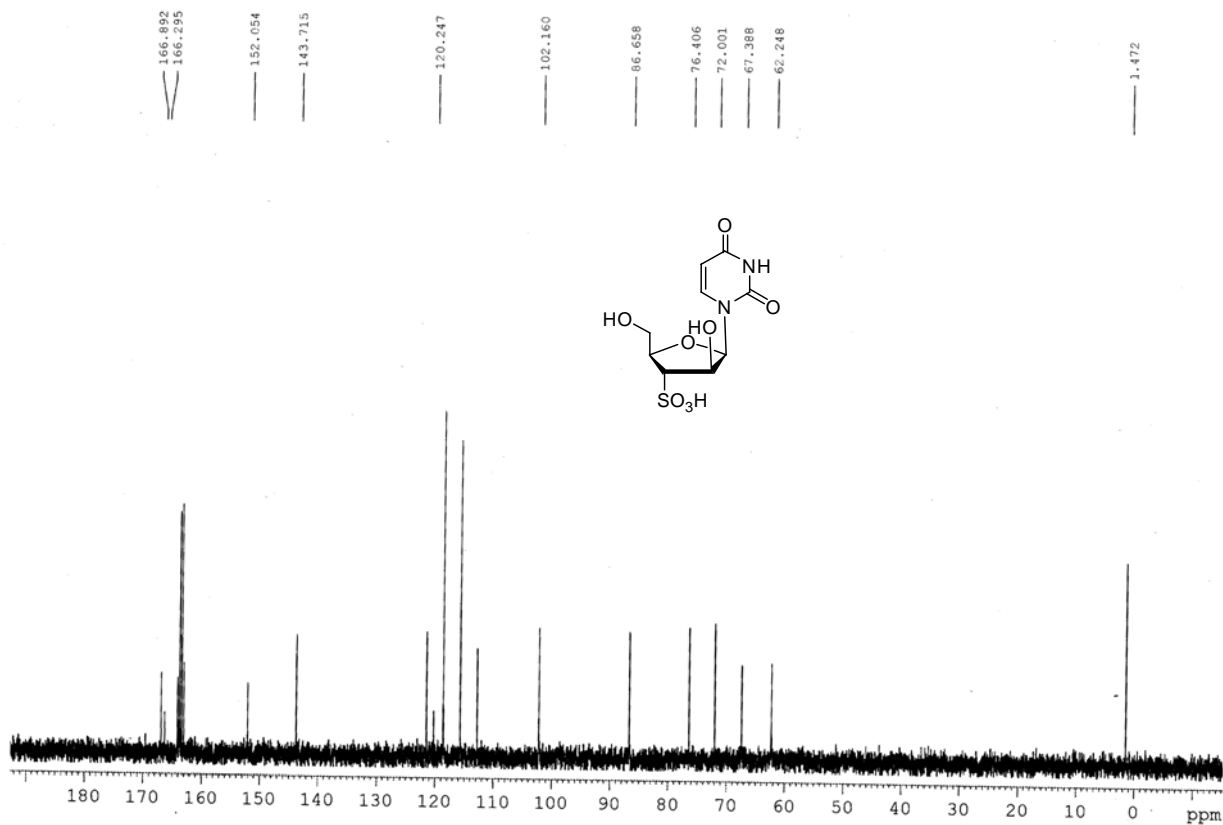

Figure S5: (A) <sup>1</sup>H (400 MHz) and (B) <sup>13</sup>C NMR (100 MHz) of 4

ptd.dj.usna- dept1:

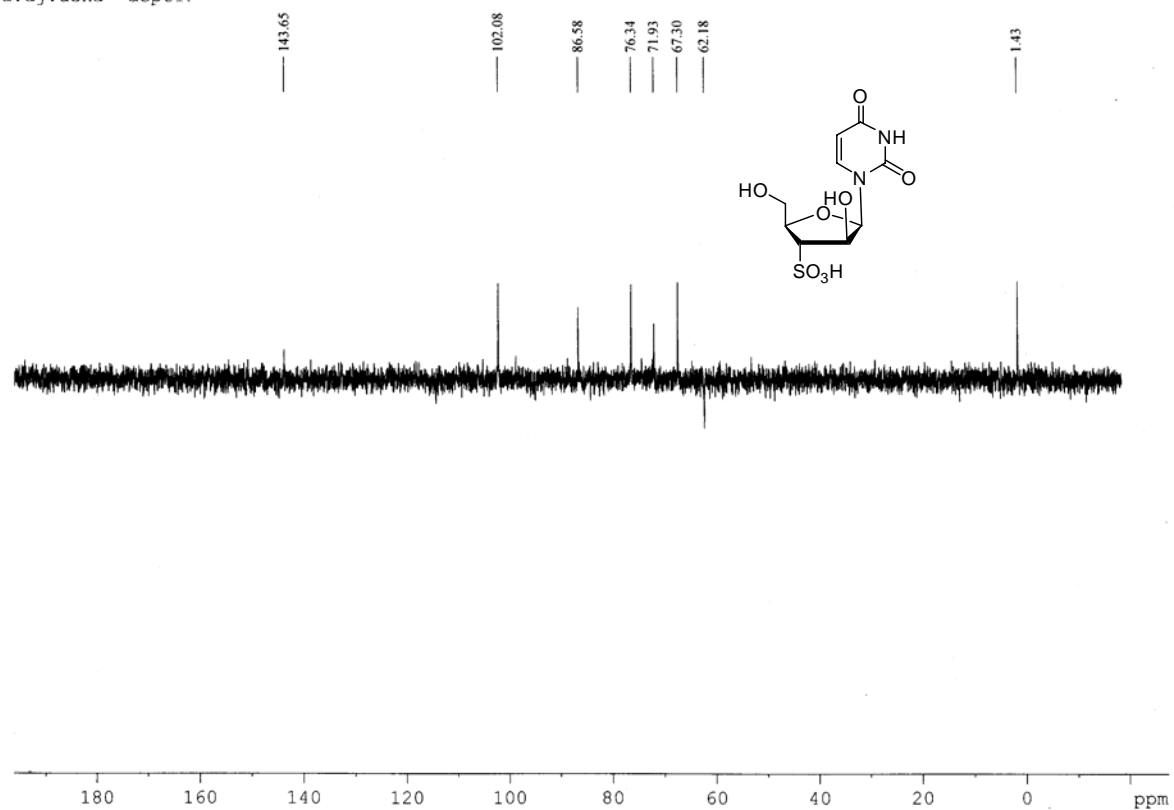

**Figure S6:** DEPT 135 (50 MHz) of **4**.

## Biophysical assays:

### Lineweaver-Burk plots:

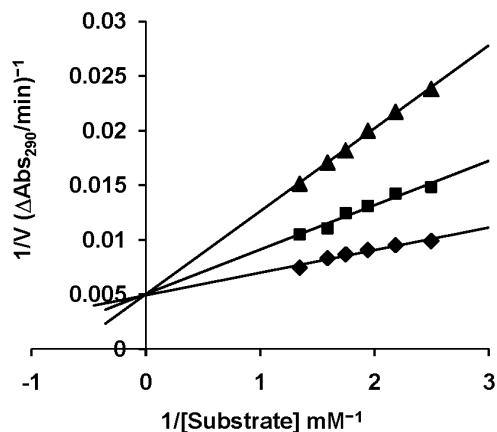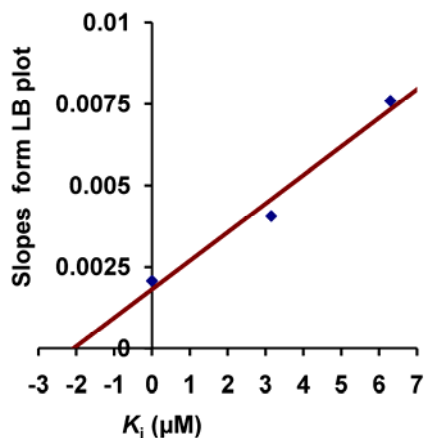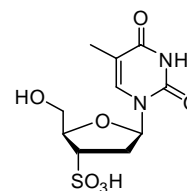

**Figure S7:** Lineweaver-Burk plot for inhibition of RNase A by inhibitor **2** of 6.30 (▲), 3.15 (■), 0.0 (◆)  $\mu\text{M}$  with 2',3'-cCMP as substrate (0.74-0.40  $\mu\text{M}$ ) and RNase A concentration of 10.0  $\mu\text{M}$ .

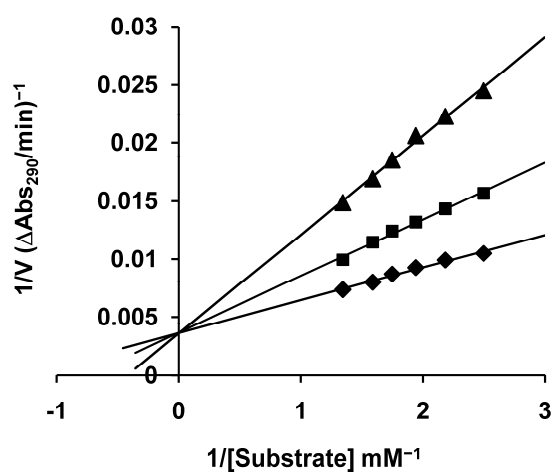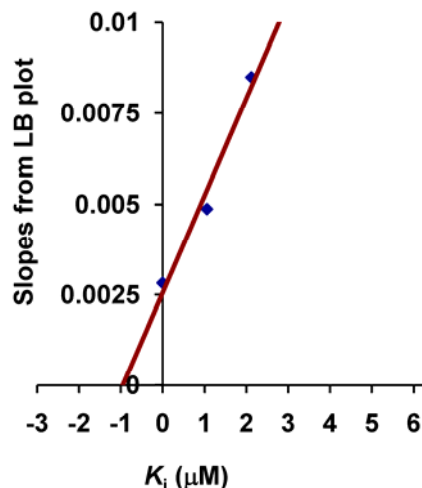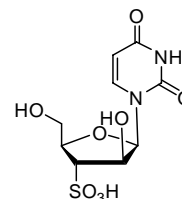

**Figure S8:** Lineweaver-Burk plot for inhibition of RNase A by inhibitor **4** of 2.16 (▲), 1.06 (■), 0.0 (◆)  $\mu\text{M}$  with 2',3'-cCMP as substrate (0.74-0.40  $\mu\text{M}$ ) and RNase A concentration of 10.0  $\mu\text{M}$ .

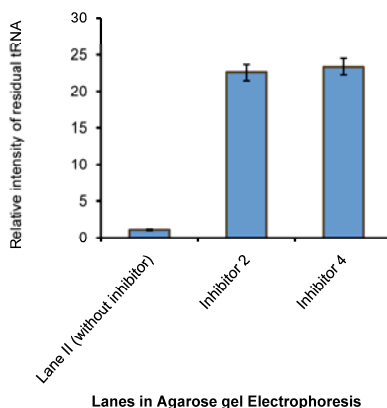

**Figure S9:** Relative intensity of residual tRNA in Agarose Gel electrophoresis for inhibitor **2** and **4** considering Lane IV.



*Docking Studies:*

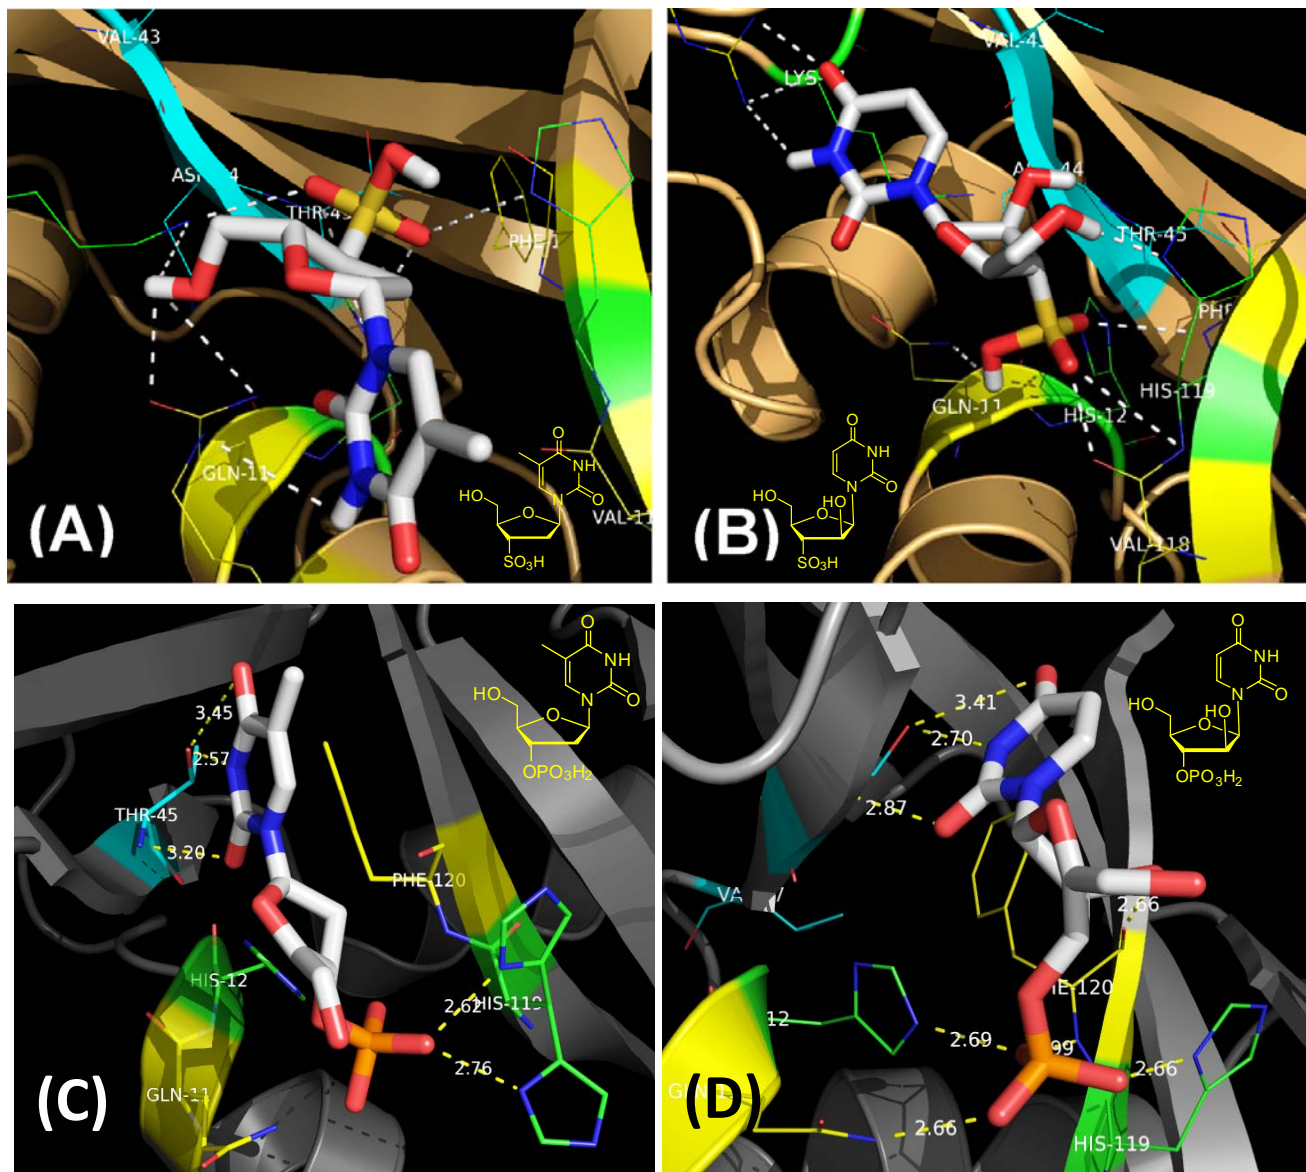

**Figure S10:** Docked poses of compound (A) **2**, (B) **4**, (C) inhibitor **B** and (D) inhibitor **L** with RNase A (1FS3) where cyan, green and yellow colored amino-acid residues are of B<sub>1</sub>, P<sub>1</sub> and other subsites respectively.

**Table S1:** Hydrogen bonding distance (Å) of compound **2** and **4** with amino acid residues of RNase A (1FS3)

| RNase A<br>(PDB ID:<br><b>1FS3</b> )<br>Amino acid<br>residues | 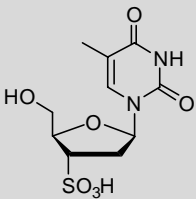 |  |                          |  |
|----------------------------------------------------------------|-----------------------------------------------------------------------------------|-----------------------------------------------------------------------------------|------------------------------------------------------------------------------------------------------------|-------------------------------------------------------------------------------------|
| <b>Lys7 Nζ</b>                                                 | 3.11 [NH] of Thymine N3                                                           |                                                                                   |                                                                                                            |                                                                                     |
| <b>Glu11 Nε2</b>                                               | 3.35 [5'-OH]                                                                      | 2.45 [OH] of SO <sub>3</sub> H group                                              | 2.66 [O1] of OPO <sub>3</sub> H <sub>2</sub> group                                                         |                                                                                     |
| <b>Glu11 Oε1</b>                                               | 2.61 [5'-OH]                                                                      |                                                                                   |                                                                                                            |                                                                                     |
| <b>Arg39 NH1</b>                                               | 2.53 [O] of Thymine C4                                                            |                                                                                   |                                                                                                            |                                                                                     |
| <b>Arg39 NH2</b>                                               | 2.97 [NH] of Thymine N3<br>2.85 [O] of Thymine C4                                 |                                                                                   |                                                                                                            |                                                                                     |
| <b>His12 Nε2</b>                                               | 3.15 [O] of SO <sub>3</sub> H group<br>3.89 [O] of SO <sub>3</sub> H group        | 2.70 [O] of SO <sub>3</sub> H group                                               | 2.62 [O1] of OPO <sub>3</sub> H <sub>2</sub> group                                                         |                                                                                     |
| <b>His119 Nδ1</b>                                              | 3.48 [O] of SO <sub>3</sub> H group                                               | 1.89 [5'-OH]                                                                      | <b>His119 Nδ1 A form</b><br>2.76 [O1] of OPO <sub>3</sub> H <sub>2</sub> group<br><b>His119 Nδ1 B form</b> |                                                                                     |
| <b>Lys41 Nζ</b>                                                | 3.16 [O] of SO <sub>3</sub> H group<br>3.26 [5'-OH]                               |                                                                                   |                                                                                                            |                                                                                     |
| <b>Val118 amide C=O</b>                                        | 2.43 [O] of SO <sub>3</sub> H group                                               |                                                                                   |                                                                                                            |                                                                                     |
| <b>Val118 amide NH</b>                                         | 3.44 [O] of SO <sub>3</sub> H group                                               |                                                                                   |                                                                                                            |                                                                                     |
| <b>Phe120 C=O</b>                                              | 2.66 [ara-2'-OH]                                                                  |                                                                                   |                                                                                                            |                                                                                     |
| <b>Phe120 NH</b>                                               | 2.99 [O3] of OPO <sub>3</sub> H <sub>2</sub> group                                |                                                                                   |                                                                                                            |                                                                                     |
| <b>Thr45 Oγ1</b>                                               | 3.45 [O] of Thymine C4<br>2.57 [N] of Thymine N3                                  |                                                                                   |                                                                                                            |                                                                                     |
| <b>Thr45 NH</b>                                                | 3.41 [O] of Thymine C4<br>2.70 [N] of Thymine N3                                  |                                                                                   |                                                                                                            |                                                                                     |
|                                                                | 3.20 [O] of Thymine C2                                                            |                                                                                   |                                                                                                            |                                                                                     |
|                                                                | 2.87 [O] of Thymine C2                                                            |                                                                                   |                                                                                                            |                                                                                     |
